# Supplementary material
Source: publisher figshare collection journal article supplement (https://acs.figshare.com/ndownloader/files/4550683)
Supplement: Supplementary file 1 [file 4550683]

## Supporting information

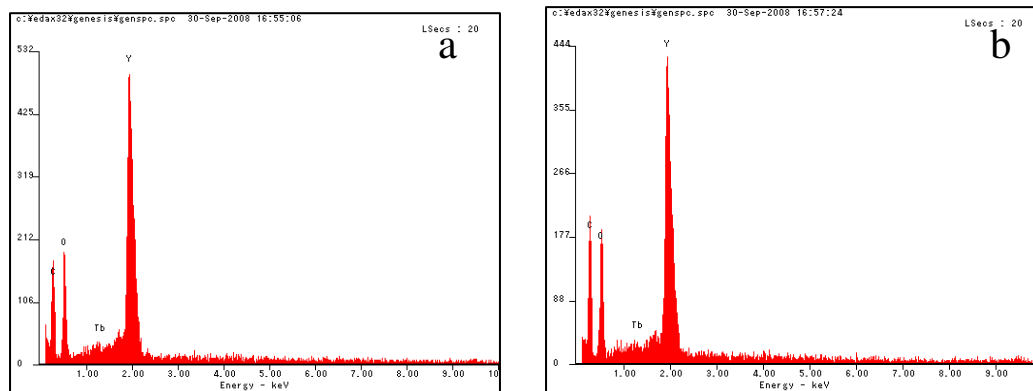

**Figure S1.** EDS spectra of as prepared precursor sample (a), and calcined samples at 900°C for 4 h (b).

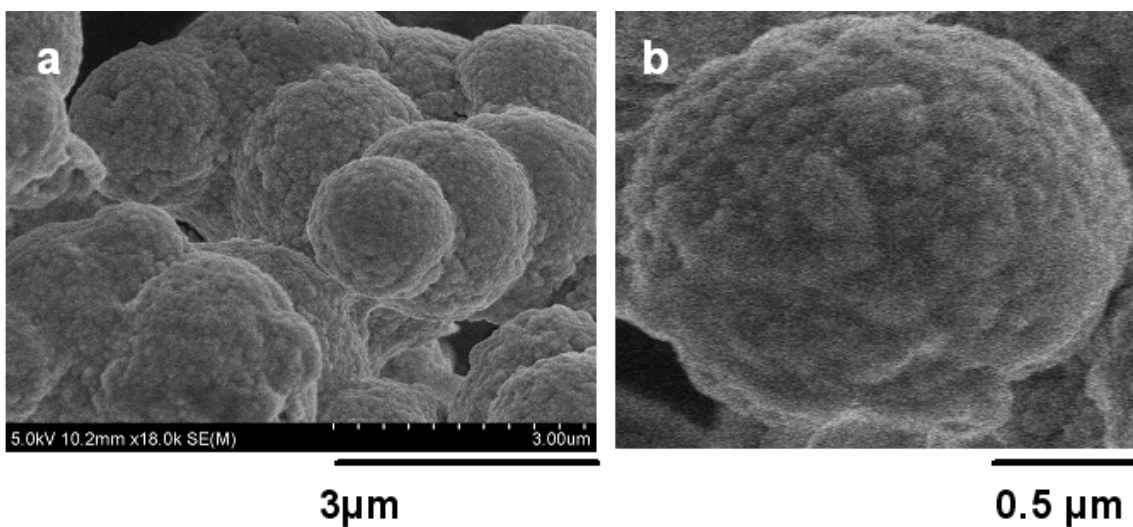

**Figure S2.** FESEM image of calcined sample at 1000°C for 4 h, showing many hollow microsphere (a), and single hollow microsphere (b).
